# Supplementary material for: Personalized and Gamified Auditory-Cognitive Training Improves Naturalistic Speech-In-Noise Comprehension in Older Adults with Hearing Loss
Source: Research Square preprint supplement (doi:10.21203/rs.3.rs-6880058/v1), 2025-07-02
Supplement: Supplementary file 1 [file 42715313699d0686c33714d8.pdf]

## Supplemental Materials

### Supplementary Table 1

Summary statistics on demographic and cognitive baselines by group.

|                                              | Experimental Group        | Active control           |
|----------------------------------------------|---------------------------|--------------------------|
|                                              | <i>n</i> = 34 (13 female) | <i>n</i> = 20 (9 female) |
| <b><i>Age (years)</i></b>                    |                           |                          |
| Mean ( <i>SD</i> )                           | 70.1 (3.7)                | 72.3 (5)                 |
| Median [min, max]                            | 70 [65, 79]               | 72 [65, 82]              |
| <b><i>Hearing threshold (PTA)</i></b>        |                           |                          |
| Mean ( <i>SD</i> )                           | 35.8 (9.4)                | 33.4 (9.5)               |
| Median [min, max]                            | 35 [20, 60.7]             | 31.1 [20, 58.1]          |
| <b><i>MoCA</i></b>                           |                           |                          |
| Mean ( <i>SD</i> )                           | 28 (1.7)                  | 28.4 (1.6)               |
| Median [min, max]                            | 29 [24, 30]               | 28 [24, 30]              |
| <b><i>Training intensity (minutes)</i></b>   |                           |                          |
| Mean ( <i>SD</i> )                           | 1007.1 (335.7)            | 981.4 (308.5)            |
| Median [min, max]                            | 930 [580, 1800]           | 917 [590, 1700]          |
| <b><i>Working memory</i></b>                 |                           |                          |
| Mean ( <i>SD</i> )                           | 0.7 (0.2)                 | 0.7 (0.2)                |
| Median [min, max]                            | 0.8 [0.1, 1]              | 0.7 [0.2, 0.9]           |
| <b><i>Phonological Short-term memory</i></b> |                           |                          |
| Mean ( <i>SD</i> )                           | 5.3 (1.1)                 | 4.8 (1.4)                |
| Median [min, max]                            | 5 [3, 8]                  | 5 [3, 8]                 |
| <b><i>Selective Attention</i></b>            |                           |                          |
| Mean ( <i>SD</i> )                           | 12.3 (6.4)                | 11.9 (6.6)               |
| Median [min, max]                            | 12.8 [-5, 23.3]           | 10.8 [-2.2, 24.3]        |
| <b><i>Divided Attention</i></b>              |                           |                          |

|                    |                   |                   |
|--------------------|-------------------|-------------------|
| Mean ( <i>SD</i> ) | 0.64 (0.27)       | 0.49 (0.28)       |
| Median [min, max]  | 0.67 [0.17, 1.15] | 0.49 [0.04, 0.99] |

## Supplementary Table 2

*Parameter estimates for the effects of session, number of training sessions, and subject\_level random intercept on performance in trained cognitive tasks.*

| Independent Variable | Predictors              | Estimate<br>( $\beta$ ) | CI             | <i>p</i>        |
|----------------------|-------------------------|-------------------------|----------------|-----------------|
| Working Memory       |                         |                         |                |                 |
|                      | (Intercept)             | 42.49                   | [31.23, 53.75] | <b>&lt;.001</b> |
|                      | session [Post-Training] | 27.92                   | [14.91, 40.93] | <b>&lt;.001</b> |
|                      | age (z)                 | -1.22                   | [-7.75, 5.31]  | .715            |
|                      | pta <sub>4000</sub> (z) | 2.16                    | [-4.84, 9.16]  | .548            |
|                      | hearing aid [yes]       | 9.13                    | [-4.44, 22.70] | .189            |
|                      | Random Effects          |                         |                |                 |
|                      | $\sigma^2$              | 683.00                  |                |                 |
|                      | $\tau_{00 \text{ id}}$  | 0.00                    |                |                 |
| Phonological STM     |                         |                         |                |                 |
|                      | (Intercept)             | 45.81                   | [34.17, 57.45] | <b>&lt;.001</b> |
|                      | session [Post-Training] | 12.18                   | [1.89, 22.47]  | <b>.020</b>     |
|                      | age (z)                 | 3.56                    | [-3.85, 10.97] | .346            |
|                      | pta <sub>4000</sub> (z) | 0.73                    | [-7.25, 8.70]  | .859            |
|                      | hearing aid [yes]       | 17.58                   | [2.35, 32.80]  | <b>.026</b>     |
|                      | Random Effects          |                         |                |                 |
|                      | $\sigma^2$              | 427.00                  |                |                 |
|                      | $\tau_{00 \text{ id}}$  | 225.10                  |                |                 |
| Selective Attention  |                         |                         |                |                 |
|                      | (Intercept)             | 87.41                   | [82.62, 92.20] | <b>&lt;.001</b> |
|                      | session [Post-Training] | 11.20                   | [5.68, 16.72]  | <b>&lt;.001</b> |
|                      | age (z)                 | -2.53                   | [-5.31, 0.25]  | .074            |
|                      | pta <sub>4000</sub> (z) | 1.50                    | [-1.49, 4.50]  | .324            |

|                         |                         |        |                |       |
|-------------------------|-------------------------|--------|----------------|-------|
|                         | hearing aid [yes]       | -0.69  | [-6.47, 5.09]  | .815  |
|                         | Random Effects          |        |                |       |
|                         | $\sigma^2$              | 123.00 |                |       |
|                         | $\tau_{00}$ id          | 0.00   |                |       |
| Divided Attention       |                         |        |                |       |
|                         | (Intercept)             | 47.49  | [36.29, 58.70] | <.001 |
|                         | session [Post-Training] | 18.51  | [9.21, 27.81]  | <.001 |
|                         | age (z)                 | -0.13  | [-7.36, 7.10]  | .971  |
|                         | pta <sub>4000</sub> (z) | -2.58  | [-10.37, 5.21] | .517  |
|                         | hearing aid [yes]       | 17.02  | [1.92, 32.12]  | .027  |
|                         | Random Effects          |        |                |       |
|                         | $\sigma^2$              | 362.67 |                |       |
|                         | $\tau_{00}$ id          | 272.36 |                |       |
| Contrasts               |                         |        |                |       |
| session [Pre-Training]  | -1                      |        |                |       |
| session [Post-Training] | 1                       |        |                |       |

### Supplementary Table 3

*Training effect model parameter estimates per untrained cognitive task.*

| Independent Variable | Predictors                              | Estimate ( $\beta$ ) | CI              | <i>p</i> |
|----------------------|-----------------------------------------|----------------------|-----------------|----------|
| Working Memory       |                                         |                      |                 |          |
|                      | (Intercept)                             | 40.996               | [30.23, 51.76]  | <.001    |
|                      | session [Post-Training]                 | 8.922                | [3.57, 14.27]   | .001     |
|                      | group [EG-HL]                           | -7.554               | [-16.64, 1.53]  | .103     |
|                      | age_z                                   | -5.875               | [-14.55, 2.80]  | .184     |
|                      | pta_4000_z                              | -0.396               | [-8.43, 7.64]   | .923     |
|                      | hearing_aid [Yes]                       | 1.920                | [-14.73, 18.57] | .821     |
|                      | session [Post-Training] × group [EG-HL] | -1.805               | [-7.16, 3.55]   | .508     |
|                      | Random Effects                          |                      |                 |          |
|                      | $\sigma^2$                              | 148.5                |                 |          |

|                     |                                               |        |                 |                 |
|---------------------|-----------------------------------------------|--------|-----------------|-----------------|
|                     | $\tau_{00}$ id                                | 658.1  |                 |                 |
| Phonological STM    |                                               |        |                 |                 |
|                     | (Intercept)                                   | 29.795 | [20.56, 39.03]  | <b>&lt;.001</b> |
|                     | timepoints [Post-Training]                    | 11.952 | [4.61, 19.30]   | <b>.001</b>     |
|                     | group [EG-HL]                                 | -4.097 | [-12.21, 4.01]  | .322            |
|                     | age_z                                         | 0.092  | [-6.61, 6.79]   | .978            |
|                     | pta_4000_z                                    | 0.329  | [-6.29, 6.95]   | .922            |
|                     | hearing_aid [yes]                             | -1.044 | [-14.98, 12.89] | .883            |
|                     | timepoints [Post-Training] :<br>group [EG-HL] | -0.310 | [-7.65, 7.03]   | .934            |
|                     | Random Effects                                |        |                 |                 |
|                     | $\sigma^2$                                    | 336.9  |                 |                 |
|                     | $\tau_{00}$ id                                | 391.1  |                 |                 |
| Selective Attention |                                               |        |                 |                 |
|                     | (Intercept)                                   | 37.979 | [28.05, 47.91]  | <b>&lt;.001</b> |
|                     | session [Post-Training]                       | 14.338 | [5.94, 22.74]   | <b>.001</b>     |
|                     | group [EG-HL]                                 | -1.700 | [-10.61, 7.21]  | .708            |
|                     | age_z                                         | 1.620  | [-6.51, 9.75]   | .696            |
|                     | pta_4000_z                                    | -5.718 | [-12.39, 0.95]  | .093            |
|                     | hearing aid [yes]                             | -3.118 | [-17.78, 11.54] | .677            |
|                     | session [Post-Training] :<br>group [EG-HL]    | -0.937 | [-9.32, 7.45]   | .827            |
|                     | Random Effects                                |        |                 |                 |
|                     | $\sigma^2$                                    | 329.6  |                 |                 |
|                     | $\tau_{00}$ id                                | 355.5  |                 |                 |
| Divided Attention   |                                               |        |                 |                 |
|                     | (Intercept)                                   | 54.431 | [44.61, 64.25]  | <b>&lt;.001</b> |
|                     | timepoint [Post-Training]                     | 1.496  | [-7.00, 9.99]   | .729            |
|                     | group [EG-HL]                                 | -6.569 | [-15.21, 2.07]  | .136            |
|                     | age_z                                         | -5.236 | [-12.43, 1.96]  | .154            |
|                     | pta_4000_z                                    | 4.188  | [-3.18, 11.56]  | .265            |
|                     | hearing aid [yes]                             | -6.435 | [-20.96, 8.09]  | .385            |

|                           |       |               |      |
|---------------------------|-------|---------------|------|
| session [Post-Training] : | 1.092 | [-7.41, 9.59] | .800 |
| group [EG-HL]             |       |               |      |
| Random Effects            |       |               |      |
| $\sigma^2$                | 384.3 |               |      |
| $\tau_{00 \text{ id}}$    | 365.0 |               |      |
| Contrasts                 |       |               |      |
| session [Pre-Training]    | -1    |               |      |
| session [Post-Training]   | 0     |               |      |
| session [Follow-Up]       | 1     |               |      |
| group [CG-HL]             | -1    |               |      |
| group [EG-HL]             | 1     |               |      |

#### Supplementary Table 4

*Parameter estimates for the effects of session, group, and noise level on performance in the speech comprehension task.*

| Predictors                                 | Estimate (OR) | CI             | <i>p</i> |
|--------------------------------------------|---------------|----------------|----------|
| (intercept)                                | 4.10          | [3.53, 4.68]   | <.001    |
| session [Post-Training]                    | 0.01          | [-0.21, 0.24]  | .897     |
| group [EG-HL]                              | -0.16         | [-0.51, 0.20]  | .382     |
| noise level [Low-Noise]                    | -2.81         | [-3.50, -2.12] | <.001    |
| noise level [High-Noise]                   | -5.05         | [-5.76, -4.34] | <.001    |
| pta <sub>4000</sub> (z)                    | -0.43         | [-0.59, -0.27] | <.001    |
| age (z)                                    | -0.16         | [-0.33, 0.02]  | .079     |
| hearing aid [yes]                          | -0.07         | [-0.42, 0.28]  | .681     |
| session : group                            | 0.38          | [0.22, 0.54]   | <.001    |
| session : noise level [Low-Noise]          | -0.26         | [-0.50, -0.02] | .035     |
| session : noise level [High-Noise]         | -0.20         | [-0.44, 0.04]  | .104     |
| group : noise level [Low-Noise]            | -0.09         | [-0.44, 0.26]  | .605     |
| group : noise level [High-Noise]           | -0.07         | [-0.44, 0.31]  | .733     |
| session : group : noise level [Low-Noise]  | -0.18         | [-0.32, -0.05] | .009     |
| session : group : noise level [High-Noise] | -0.26         | [-0.40, -0.12] | <.001    |
| Random Effects                             |               |                |          |

|                                                     |      |
|-----------------------------------------------------|------|
| $\sigma^2$                                          | 3.29 |
| $\tau_{00}$ noise_level:item                        | 2.78 |
| $\tau_{00}$ id                                      | 1.20 |
| $\tau_{11}$ noise_level:item.noise_level:low-noise  | 0.88 |
| $\tau_{11}$ noise_level:item.noise_level:high-noise | 0.76 |
| $\tau_{11}$ noise_level:item.sessionPost-Training   | 0.20 |
| $\tau_{11}$ id.noise_level:low-noise                | 0.57 |
| $\tau_{11}$ id.noise_level:high-noise               | 0.18 |
| $\tau_{11}$ id.sessionPost-Training                 | 0.12 |
| Contrasts                                           |      |
| session [Pre-Training]                              | -1   |
| session[Post-Training]                              | 1    |
| group [CG-HL]                                       | -1   |
| group [EG-HL]                                       | 1    |
| noise_level [No-Noise]                              | -1   |
| noise_level [Low-Noise]                             | 0    |
| noise_level [High-Noise]                            | 1    |

**Supplementary Table 5**

| Independent Variable | Predictors                       | Estimate ( $\beta$ ) | CI               | <i>p</i>        |
|----------------------|----------------------------------|----------------------|------------------|-----------------|
| OLSA                 |                                  |                      |                  |                 |
|                      | (Intercept)                      | -5.388               | [-6.236, -4.539] | <b>&lt;.001</b> |
|                      | session [Post-Training]          | -0.226               | [-0.736, 0.284]  | .385            |
|                      | group [EG-HL]                    | 0.421                | [-0.618, 1.460]  | .427            |
|                      | pta_4000_z                       | 1.003                | [0.522, 1.483]   | <b>&lt;.001</b> |
|                      | age_z                            | 0.332                | [-0.132, 0.797]  | .161            |
|                      | hearing_aid [Yes]                | 0.764                | [-0.152, 1.681]  | .102            |
|                      | session [Post-Training] $\times$ | -0.189               | [-0.820,         | .558            |

|                  |                                            |        |                     |             |
|------------------|--------------------------------------------|--------|---------------------|-------------|
|                  | group [EG-HL]                              |        | 0.443]              |             |
|                  | Random Effects                             |        |                     |             |
|                  | $\sigma^2$                                 | 0.612  |                     |             |
|                  | $\tau_{00 \text{ id}}$                     | 2.300  |                     |             |
| SSQ              |                                            |        |                     |             |
|                  | (Intercept)                                | 0.148  | [-0.152,<br>0.448]  | .335        |
|                  | session [Post-Training]                    | 0.119  | [-0.170,<br>0.409]  | .419        |
|                  | group [EG-HL]                              | 0.062  | [-0.315,<br>0.440]  | .746        |
|                  | pta_4000_z                                 | -0.021 | [-0.174,<br>0.132]  | .783        |
|                  | age_z                                      | 0.037  | [-0.119,<br>0.194'] | .641        |
|                  | hearing_aid [Yes]                          | -0.237 | [-0.556,<br>0.081]  | .146        |
|                  | session [Post-Training] ×<br>group [EG-HL] | -0.014 | [-0.378,<br>0.349]  | .938        |
|                  | Random Effects                             |        |                     |             |
|                  | Dispersion                                 | 19.2   |                     |             |
|                  | $\tau_{00 \text{ id}}$                     | 0.210  |                     |             |
| Listening Effort |                                            |        |                     |             |
|                  | (Intercept)                                | 0.280  | [0.043,<br>0.517]   | <b>.021</b> |
|                  | session [Post-Training]                    | -0.170 | [-0.351,<br>0.011]  | .063        |
|                  | group [EG-HL]                              | -0.016 | [-0.313,<br>0.281]  | .917        |
|                  | pta_4000_z                                 | 0.027  | [-0.099,<br>0.154]  | .677        |
|                  | age_z                                      | 0.096  | [-0.034,<br>0.226]  | .149        |
|                  | hearing_aid [Yes]                          | 0.032  | [-0.230,<br>0.294]  | .811        |
|                  | session [Post-Training] ×<br>group [EG-HL] | 0.161  | [-0.065,<br>0.387]  | .161        |
|                  | Random Effects                             |        |                     |             |

|                         |    |                        |       |
|-------------------------|----|------------------------|-------|
|                         |    | Dispersion             | 51.5  |
|                         |    | $\tau_{00 \text{ id}}$ | 0.177 |
| Contrasts               |    |                        |       |
| session [Pre-Training]  | -1 |                        |       |
| session [Post-Training] | 0  |                        |       |
| session [Follow-Up]     | 1  |                        |       |
| group [CG-HL]           | -1 |                        |       |
| group [EG-HL]           | 1  |                        |       |



## Supplementary Table 6

Assessment games used in the auditory-cognitive training application, including baseline tests.

| Test Name                        | Cognitive Domain           | Description                                                                                                                                          | Documentation Link                                                                                                                                              |
|----------------------------------|----------------------------|------------------------------------------------------------------------------------------------------------------------------------------------------|-----------------------------------------------------------------------------------------------------------------------------------------------------------------|
| Digit Span Test                  | Short-Term Memory          | Assesses the ability to recall sequences of numbers in the same or reverse order, measuring short-term and working memory capacity.                  | <a href="https://static.cognifit.com/manuals/Digit+Span+Test.pdf">https://static.cognifit.com/manuals/Digit+Span+Test.pdf</a>                                   |
| Distance Estimation Test         | Spatial Perception         | Evaluates the capacity to estimate the relative distance between objects in a three-dimensional space.                                               | <a href="https://static.cognifit.com/manuals/Distance+Estimation+Test.pdf">https://static.cognifit.com/manuals/Distance+Estimation+Test.pdf</a>                 |
| Divided Attention Test           | Attention                  | Measures the ability to divide attention between two simultaneous tasks, such as tracking a moving object while responding to auditory stimuli.      | <a href="https://static.cognifit.com/manuals/Divided+Attention+Test.pdf">https://static.cognifit.com/manuals/Divided+Attention+Test.pdf</a>                     |
| Eye-Hand Coordination Test (MUD) | Coordination               | Assesses the synchronization between visual input and motor responses by requiring participants to track moving objects with precise hand movements. | <a href="https://static.cognifit.com/manuals/Eye-Hand+Coordination+Test+(MUD).pdf">https://static.cognifit.com/manuals/Eye-Hand+Coordination+Test+(MUD).pdf</a> |
| Maze Test                        | Planning & Problem-Solving | Evaluates planning skills by having participants navigate through increasingly complex mazes, requiring foresight and strategy.                      | <a href="https://static.cognifit.com/manuals/Maze+Test.pdf">https://static.cognifit.com/manuals/Maze+Test.pdf</a>                                               |

|                                         |                    |                                                                                                                                                    |                                                                                                                                                             |
|-----------------------------------------|--------------------|----------------------------------------------------------------------------------------------------------------------------------------------------|-------------------------------------------------------------------------------------------------------------------------------------------------------------|
| Multimodal<br>Lexical<br>Memory<br>Test | Verbal Memory      | Tests the ability to recognize and recall words presented through different sensory modalities, assessing verbal memory and learning.              | <a href="https://static.cognifit.com/manuals/Multimodal+Lexical+Memory+Test.pdf">https://static.cognifit.com/manuals/Multimodal+Lexical+Memory+Test.pdf</a> |
| Naming Test                             | Language           | Measures the ability to accurately and rapidly name objects presented visually, assessing lexical access and verbal expression.                    | <a href="https://static.cognifit.com/manuals/Naming+Test.pdf">https://static.cognifit.com/manuals/Naming+Test.pdf</a>                                       |
| Number-Size<br>Congruency<br>Test       | Inhibitory Control | Evaluates the ability to suppress automatic responses by requiring participants to identify numerical values while ignoring conflicting size cues. | <a href="https://static.cognifit.com/manuals/Number-Size+Congruency+Test.pdf">https://static.cognifit.com/manuals/Number-Size+Congruency+Test.pdf</a>       |
| Speed<br>Estimation<br>Test             | Processing Speed   | Assesses the ability to estimate the speed of moving objects, crucial for tasks requiring rapid visual processing.                                 | <a href="https://static.cognifit.com/manuals/Speed+Estimation+Test.pdf">https://static.cognifit.com/manuals/Speed+Estimation+Test.pdf</a>                   |
| Stroop Test                             | Inhibitory Control | Measures the capacity to inhibit cognitive interference by requiring participants to name the ink color of words that denote different colors.     | <a href="https://static.cognifit.com/manuals/Stroop+Test.pdf">https://static.cognifit.com/manuals/Stroop+Test.pdf</a>                                       |

|                                 |                   |                                                                                                                    |                                                                                                                                                                                   |
|---------------------------------|-------------------|--------------------------------------------------------------------------------------------------------------------|-----------------------------------------------------------------------------------------------------------------------------------------------------------------------------------|
| Tapping Test                    |                   | Evaluates motor speed and alertness by measuring response times to visual stimuli and repetitive tapping tasks.    | <a href="https://static.cognifit.com/manuals/Tapping+Test+++Psychomotor+Vigilance+Test.pdf">https://static.cognifit.com/manuals/Tapping+Test+++Psychomotor+Vigilance+Test.pdf</a> |
| Psychomotor Vigilance Test      | Psychomotor Speed |                                                                                                                    |                                                                                                                                                                                   |
| Time Estimation Test            | Time Perception   | Assesses the ability to perceive and estimate time intervals, important for time management and coordination.      | <a href="https://static.cognifit.com/manuals/Time+Estimation+Test.pdf">https://static.cognifit.com/manuals/Time+Estimation+Test.pdf</a>                                           |
| Visual Memory Test              | Visual Memory     | Tests the capacity to recall visual information, such as shapes and patterns, after brief exposure.                | <a href="https://static.cognifit.com/manuals/Visual+Memory+Test.pdf">https://static.cognifit.com/manuals/Visual+Memory+Test.pdf</a>                                               |
| Visual Working Memory Span Test | Working Memory    | Measures the ability to temporarily hold and manipulate visual information, essential for complex cognitive tasks. | <a href="https://static.cognifit.com/manuals/Visual+Working+Memory+Span+Test.pdf">https://static.cognifit.com/manuals/Visual+Working+Memory+Span+Test.pdf</a>                     |

Note: Table displays cognitive assessment games used for evaluating trained cognitive domains, alongside additional tests used for the training algorithm's baseline cognitive performance evaluation.
